# Supplementary material for: A Drosophila screen identifies NKCC1 as a modifier of NGLY1 deficiency
Source: eLife. 2020 Dec 14;9:e57831. doi: 10.7554/eLife.57831 (PMC7758059; doi:10.7554/eLife.57831)
Supplement: Supplementary file 1. — The number of eclosed flies were scored for each resulting genotype. The ‘no marker’ column represents flies expressing the NGLY1 RNAi. The largest balanced genotype was used as ‘expected’ for percent survival. [file elife-57831-supp1.xlsx]

## Sheet: Sheet1
	No Marker	largest control class	ratio
line_026	60	121	0.495868
line_028	0	38	0
line_038	6	100	0.06
line_040	31	139	0.223022
line_042	36	201	0.179104
line_045	77	145	0.531034
line_049	104	167	0.622754
line_057	36	142	0.253521
line_059	119	176	0.676136
line_069	14	176	0.0795455
line_073	8	87	0.091954
line_080	2	146	0.0136986
line_083	0	125	0
line_088	0	138	0
line_091	0	123	0
line_093	0	120	0
line_101	1	178	0.00561798
line_105	85	124	0.685484
line_109	28	65	0.430769
line_129	2	92	0.0217391
line_136	9	152	0.0592105
line_138	1	130	0.00769231
line_142	14	84	0.166667
line_149	73	109	0.669725
line_153	1	106	0.00943396
line_161	21	143	0.146853
line_176	35	123	0.284553
line_177	29	139	0.208633
line_181	153	241	0.634855
line_195	41	174	0.235632
line_208	14	153	0.0915033
line_217	85	134	0.634328
line_223	4	207	0.0193237
line_229	3	103	0.0291262
line_233	0	54	0
line_235	7	185	0.0378378
line_237	13	182	0.0714286
line_280	0	86	0
line_287	15	107	0.140187
line_301	0	97	0
line_304	0	75	0
line_306	15	97	0.154639
line_307	1	55	0.0181818
line_309	2	101	0.019802
line_310	0	114	0
line_317	9	65	0.138462
line_318	1	108	0.00925926
line_319	0	152	0
line_320	57	104	0.548077
line_321	19	106	0.179245
line_324	45	111	0.405405
line_332	53	67	0.791045
line_335	0	163	0
line_336	23	127	0.181102
line_338	9	94	0.0957447
line_340	0	113	0
line_350	15	163	0.0920245
line_352	36	109	0.330275
line_356	52	109	0.477064
line_357	87	112	0.776786
line_358	22	125	0.176
line_359	1	115	0.00869565
line_360	9	98	0.0918367
line_361	11	80	0.1375
line_362	39	76	0.513158
line_365	28	168	0.166667
line_367	35	91	0.384615
line_370	6	107	0.0560748
line_373	30	90	0.333333
line_374	34	100	0.34
line_377	0	92	0
line_378	0	179	0
line_379	93	96	0.96875
line_380	6	105	0.0571429
line_381	0	133	0
line_382	33	108	0.305556
line_383	5	97	0.0515464
line_385	20	119	0.168067
line_386	34	152	0.223684
line_387	0	151	0
line_391	30	69	0.434783
line_392	16	103	0.15534
line_393	0	115	0
line_398	2	138	0.0144928
line_399	1	133	0.0075188
line_405	8	130	0.0615385
line_406	33	153	0.215686
line_409	0	140	0
line_426	1	83	0.0120482
line_427	21	164	0.128049
line_437	45	87	0.517241
line_439	28	92	0.304348
line_440	0	121	0
line_441	46	74	0.621622
line_443	5	99	0.0505051
line_461	16	81	0.197531
line_476	25	50	0.5
line_486	25	35	0.714286
line_491	58	121	0.479339
line_492	32	108	0.296296
line_502	0	37	0
line_508	48	94	0.510638
line_513	15	109	0.137615
line_514	10	91	0.10989
line_530	8	84	0.0952381
line_531	1	92	0.0108696
line_535	1	139	0.00719424
line_554	29	105	0.27619
line_555	14	124	0.112903
line_563	13	148	0.0878378
line_584	18	24	0.75
line_584	8	19	0.421053
line_589	40	84	0.47619
line_595	23	41	0.560976
line_642	4	26	0.153846
line_703	21	59	0.355932
line_707	70	110	0.636364
line_712	37	113	0.327434
line_714	1	120	0.00833333
line_716	27	87	0.310345
line_721	27	93	0.290323
line_730	0	68	0
line_732	0	126	0
line_737	14	80	0.175
line_738	56	126	0.444444
line_750	0	112	0
line_761	61	118	0.516949
line_765	39	102	0.382353
line_771	8	62	0.129032
line_774	86	146	0.589041
line_776	0	93	0
line_783	43	96	0.447917
line_786	15	67	0.223881
line_787	45	93	0.483871
line_790	7	83	0.0843373
line_796	48	89	0.539326
line_799	3	71	0.0422535
line_802	2	70	0.0285714
line_804	60	106	0.566038
line_805	0	69	0
line_808	12	107	0.11215
line_812	0	138	0
line_819	0	127	0
line_821	43	114	0.377193
line_822	31	76	0.407895
line_832	1	144	0.00694444
line_837	4	123	0.0325203
line_843	0	72	0
line_849	1	111	0.00900901
line_850	0	118	0
line_852	0	129	0
line_853	4	148	0.027027
line_855	31	116	0.267241
line_859	18	132	0.136364
line_861	34	109	0.311927
line_879	0	96	0
line_882	53	66	0.80303
line_884	3	103	0.0291262
line_890	99	113	0.876106
line_892	38	67	0.567164
line_894	30	135	0.222222
line_897	7	119	0.0588235
line_900	0	93	0
line_907	4	100	0.04
line_913	40	117	0.34188
